# Supplementary material for: Audiovisual interaction between runners: Examining the role of perceptual cues in step synchronization and physiological responses
Source: Research Square preprint supplement (doi:10.21203/rs.3.rs-6650523/v1), 2025-06-06
Supplement: Supplementary file 1 [file d30ca7c59d4d0dcd1d46c2a8.docx]

**Supplementary information**

**Figure S1. Maximum absolute SF change rate for each participant in the single condition.** Participant 9 was excluded from the analysis because it deviated from the mean by > 3 SD.


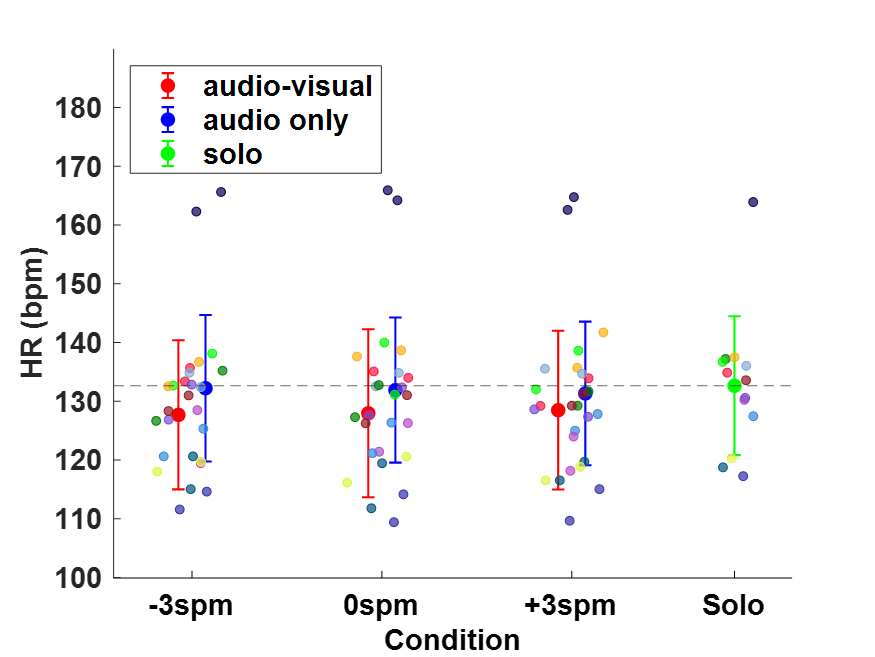


Figure S2. HR for the single and other conditions. The horizontal dashed line is the mean value in solo condition. The audio-only condition did not have a higher HR than solo condition, and the gaze from the backward runner in audio-only condition did not increase the HR.
